# Supplementary material for: Morphology engineering of a Suzuki coupling-based microporous organic polymer (MOP) using a Sonogashira coupling-based MOP for enhanced nitrophenol sensing in water
Source: Royal Society of Chemistry journal article supplement (doi:10.1039/c9cc05011f), 2019-01-01
Supplement: c9cc05011f1.pdf [file c9cc05011f1.pdf]

*Electronic Supplementary Information for*  
**Morphology engineering of Suzuki coupling-based microporous organic polymer (MOP) using Sonogashira coupling-based MOP for enhanced nitrophenol sensing in water**

Sang Hyun Ryu,<sup>a</sup> Doo Hun Lee,<sup>a</sup> Sang Moon Lee,<sup>b</sup> Hae Jin Kim,<sup>b</sup> Yoon-Joo Ko,<sup>c</sup>  
Kyoung Chul Ko,<sup>\*d</sup> and Seung Uk Son<sup>\*a</sup>

<sup>a</sup>Department of Chemistry, Sungkyunkwan University, Suwon 16419, Korea

<sup>b</sup>Korea Basic Science Institute, Daejeon 34133, Korea

<sup>c</sup>Laboratory of Nuclear Magnetic Resonance, National Center for Inter-University Research Facilities (NCIRF),  
Seoul National University, Seoul 08826, Korea d.

<sup>d</sup>Department of Chemistry Education, Chonnam National University, Gwangju 61186, Korea E-mail: kcko1982@jnu.ac.kr

### **Experimental Sections**

Water contact angles were measured by a Theta Optical Tensiometer (KSV Instruments, Ltd.) and electrooptics that comprised a CCTV camera connected to a computer (software Attension Theta). The morphologies and sizes of materials were investigated through scanning and transmission electron microscopy by a JSM6700F and a JEOL 2100F. The surface areas were measured through the analysis of N<sub>2</sub> adsorption-desorption isotherm curves which were obtained at 77K by a Micromeritics ASAP2020 and a BELSORP II-mini analyzer. The pore size distributions were analyzed by the density functional theory method. Infrared absorption spectroscopy was conducted by a Bruker VERTEX 70 FT-IR spectrometer. Solid phase <sup>13</sup>C nuclear magnetic resonance spectra (CP/TOSS mode) were obtained by a 500 MHz Bruker ADVANCE II NMR spectrometer at the National Center for Inter-University Research Facilities of Seoul National University. UV/vis absorption spectra were obtained through the conversion of the corresponding reflectance spectra which were obtained by a SHIMADZU UN-3600. The emission spectra were obtained using a JASCO FP-6200. Powder X-ray diffraction patterns were obtained by a Rigaku MAX-2200. Thermogravimetric curve was obtained by a Seiko Exstar 7300.

### **Synthesis of SUM-T, H-SOM, H-SOM@SUM-Ts**

Tetra(4-bromophenyl)ethylene was prepared by the synthetic procedures reported in the literature.<sup>1</sup> For the preparation of SUM-T, (PPh<sub>3</sub>)<sub>4</sub>Pd (2.2 mg, 1.9 μmol), K<sub>2</sub>CO<sub>3</sub> (1 mL, 2 M aqueous solution), and DMF (20 mL) were added to a flame-dried 50 mL Schlenk flask under argon. The mixture was treated by sonication for 5 min. After tetra(4-bromophenyl)ethylene (0.325 g, 0.502 mmol) and 1,4-phenylenedibromic acid (0.166 g, 1.0 mmol) were added, the reaction mixture was heated at 150 °C for 24 h. After being cooled to room temperature, the solid was separated by centrifugation, washed with water (40 mL, 7 times), acetone (40 mL, 3 times), methylene chloride (40 mL, 3 times), and ethanol (40 mL, 3 times), and dried under vacuum.

For the preparation of H-SOM@SUM-T, first, silica spheres with a diameter of 250 nm were prepared by the

Stöber method reported in the literature.<sup>2</sup> Ethanol (20 mL), distilled water (8 mL), and ammonia solution (5 mL, 28~30%) were added to a 250 mL round-bottomed flask. The mixture was stirred at room temperature for 30 min. After tetraethyl orthosilicate (14 mL) was added, the reaction mixture was stirred (800 rpm) at room temperature for 18 h. The solid was separated by centrifugation, washed with ethanol (40 mL, 4 times), and dried at room temperature. The silica spheres were treated at 500 °C for 5 h in a furnace under air and then, cooled. For the preparation of H-SOM, silica spheres (0.50 g),  $(\text{PPh}_3)_2\text{PdCl}_2$  (14 mg, 20  $\mu\text{mol}$ ), CuI (4.0 mg, 21  $\mu\text{mol}$ ), triethylamine (40 mL), and toluene (20 mL) were added to a flame-dried 100 mL Schlenk flask. The reaction mixture was sonicated for 1 h at room temperature. After tetra(4-ethynylphenyl)methane (83 mg, 0.20 mmol) and 1,4-diodobenzene (132 mg, 0.400 mmol) were added, the reaction mixture was heated at 80 °C for 24 h. After being cooled to room temperature, the solid was separated by centrifugation, washed with methylene chloride (40 mL, 4 times), acetone (40 mL, 4 times), and ethanol (40 mL, 4 times), and dried under vacuum. The solid ( $\text{SiO}_2@\text{SOM}$ ) was added to a mixture of HF (5 mL, 45% aqueous solution), water (15 mL), and methanol (10 mL) in a 50 mL Falcon tube. *Caution: The HF solution is very toxic and should be handled in a hood with specific gloves.* The mixture was stirred at room temperature for 2 h. The solid was separated by centrifugation, washed with a mixture of water (30 mL) and methanol (10 mL) 5 times, and methanol (40 mL) 3 times, and dried under vacuum. *Caution: The excess HF solution should be neutralized by adding NaOH solution.*

For the preparation of H-SOM@SUM-T1, H-SOM (10 mg),  $(\text{PPh}_3)_4\text{Pd}$  (0.3 mg, 0.3  $\mu\text{mol}$ ),  $\text{K}_2\text{CO}_3$  (0.1 mL, 2 M aqueous solution), and DMF (10 mL) were added to a flame-dried 50 mL Schlenk flask under argon. The mixture was sonicated for 5 min. After tetra(4-bromophenyl)ethylene (6.5 mg, 10  $\mu\text{mol}$ ) and 1,4-phenylenedibromic acid (3.3 mg, 20  $\mu\text{mol}$ ) were added, the reaction mixture was heated at 150 °C for 24 h. After being cooled to room temperature, the solid was separated by centrifugation, washed with water (40 mL, 7 times), acetone (40 mL, 3 times), methylene chloride (40 mL, 3 times), and ethanol (40 mL, 3 times), and dried under vacuum. For the preparation of H-SOM@SUM-T2, the same procedures were applied except using  $(\text{PPh}_3)_4\text{Pd}$  (0.70 mg, 0.61  $\mu\text{mol}$ ),  $\text{K}_2\text{CO}_3$  (0.3 mL, 2 M aqueous solution), tetra(4-bromophenyl)ethylene (19.5 mg, 30  $\mu\text{mol}$ ), and 1,4-phenylenedibromic acid (9.9 mg, 60  $\mu\text{mol}$ ). For the preparation of H-SOM@SUM-T3, the same procedures were applied except using  $(\text{PPh}_3)_4\text{Pd}$  (1.1 mg, 1.0  $\mu\text{mol}$ ),  $\text{K}_2\text{CO}_3$  (0.5 mL, 2 M aqueous solution), tetra(4-bromophenyl)ethylene (32.5 mg, 50.1  $\mu\text{mol}$ ), and 1,4-phenylenedibromic acid (16.5 mg, 100  $\mu\text{mol}$ ).

### ***Procedures of sensing studies***

Aqueous solutions of 2,4,6-trinitrophenol (TNP), 2,6-dinitrophenol (DNP), 4-nitrophenol (4NP), 2-nitrophenol (2NP), phenol, 4-chlorophenol, and 4-methylphenol with concentrations of 0, 0.00050, 0.010, 0.020, 0.030, 0.040, 0.10, 0.25, and 1.0 mM were prepared. H-SOM@SUM-T or SUM-T (5 mg) was dispersed in distilled water (30 mL). The substrate solution (1.5 mL) and the dispersion (1.5 mL) of H-SOM@SUM-T or SUM-T were mixed. After 30 min, the emission intensities at 517 nm for H-SOM@SUM-T1 and at 547 nm for H-SOM@SUM-T2 and H-SOM@SUM-T3 were measured with an excitation

wavelength of 410 nm. The measurement was repeated three times for each test. The  $K_{sv}$  values were obtained through the Stern-Volmer plots ( $I_0/I = K_{sv}[M]+1$ ,  $I_0$ : the original intensity of emission,  $I$ : the emission intensity in the presence of sensing targets,  $R^2 > 0.99$  in the linear regressions.) The limit of detection was obtained from the  $3\sigma/S$  value ( $\sigma$ : standard deviation,  $S$ : slope).

For the recyclability tests, the solution of TNP (1.5 mL, 1.0 mM) and the dispersion of H-SOM@SUM-T2 (1.5 mL, 0.17 mg/mL) were mixed. After 30 min, the emission intensity at 547 nm (an excitation wavelength of 410 nm) was measured. The H-SOM@SUM-T2 was retrieved by filtration using Omnipore™ Membrane Filters (0.2  $\mu$ m JG, Merck Milipore Ltd.). After being washed with water (200 mL), the H-SOM@SUM-T2 was dispersed in distilled water (1.5 mL). After TNP solution (1.5 mL, 1.0 mM) was added to the mixture, the emission spectrum (excitation wavelength: 410 nm) was obtained. These procedures were repeated.

### ***Procedures of computational simulations***

To simulate the frontier orbital energy levels of SUM-T, we carried out the density functional theory (DFT) calculations. First, we designed three model systems (SUM-T-1, SUM-T-5 and SUM-T- $\infty$ ) of SUM-T depending on the size of networks of SUM-T. (Fig. S5 in the ESI) The B3LYP/light-tier-1 level of theory was employed for the DFT calculations. The convergence criterion for structure optimizations was set as 0.01 eV/Å. For SUM-T- $\infty$ , PBE/light-tier-1 level of theory was used for full optimizations of atomic geometries as well as the unit cell parameters, because periodic boundary condition (PBC) calculation with hybrid functional requires huge computational cost. The unit cell parameters of SUM-T- $\infty$  are optimized as  $a = 24.31$  Å,  $b = 18.51$  Å and  $c = 46.31$  Å within 0.02 eV/Å criteria. It is noted that we added the 40 Å of vacuum spacing along the c-axis to avoid the interaction between slabs in PBC condition. After unit cell optimization with PBE functional, single point calculation with B3LYP/light-tier-1 was performed to obtain the valence band and conduction band levels. The k-grid point grid was chosen as gamma point (1×1×1). All DFT calculations were carried out using FHI-aims codes.<sup>3</sup> The molar volume calculations of TNP, DNP, 2NP and 4NP were conducted within B3LYP/6-31+G(d,p) level using Gaussian 09 program. (Fig. S8 in the ESI)

The fluorescence quenching process of nitrophenol sensing for SUM-T can be understood by the photo-induced electron transfer (PET) mechanism.<sup>4</sup> Fig. S6 in the ESI shows the calculated HOMO and LUMO energy levels for three model systems of SUM-T and substrates. On the basis of SUM-T-1, SUM-T-5 and SUM-T- $\infty$ , we can estimate the frontier orbital energy levels of SUM-T including the deviations affected by organic polymer sizes. The LUMO energy levels for SUM-T were calculated to be around -1.87 ~ -2.32 eV. The calculated LUMO levels of nitrophenol moieties (TNP, DNP, 2NP and 4NP) are lower than those of SUM-T. For this reason, the photo-generated electrons of SUM-T can migrate to nitrophenols, resulting in fluorescence quenching. On the other hand, the fluorescence emission of SUM-T can be maintained for 4-chlorophenol, phenol and 4-methylphenol due to their higher LUMO energy levels compared with those of SUM-T.

## References

1. Y. Xu, D. Chang, S. Feng, C. Zhang and J. -X. Jiang, *New J. Chem.* 2016, **40**, 9415-9423.
2. W. Stöber, A. Fink and E. Bohn, *J. Colloid Interface Sci.* 1968, **26**, 62-69.
3. V. Blum, R. Gehrke, F. Hanke, P. Havu, V. Havu, X. Ren, K. Reuter and M. Scheffler, *Comput. Phys. Commun.* 2009, **180**, 2175–2196.
4. E. V. Anslyn and D. A. Dougherty, *Modern physical organic chemistry*, University Science Books, Sausalito, CA, 2006, 955-956.

**Fig. S1** (a) SEM image and (b) PXRD pattern of  $\text{KHSi}_2\text{O}_5$  formed by the reaction of silica templates and  $\text{K}_2\text{CO}_3$ .

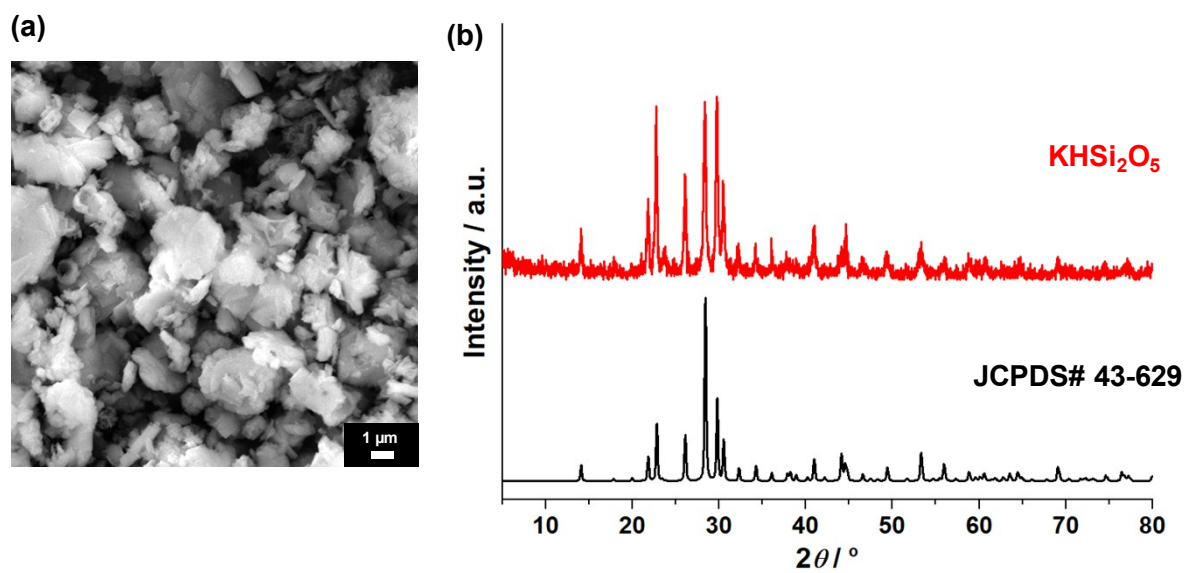

**Fig. S2** SEM images of SUM-T.

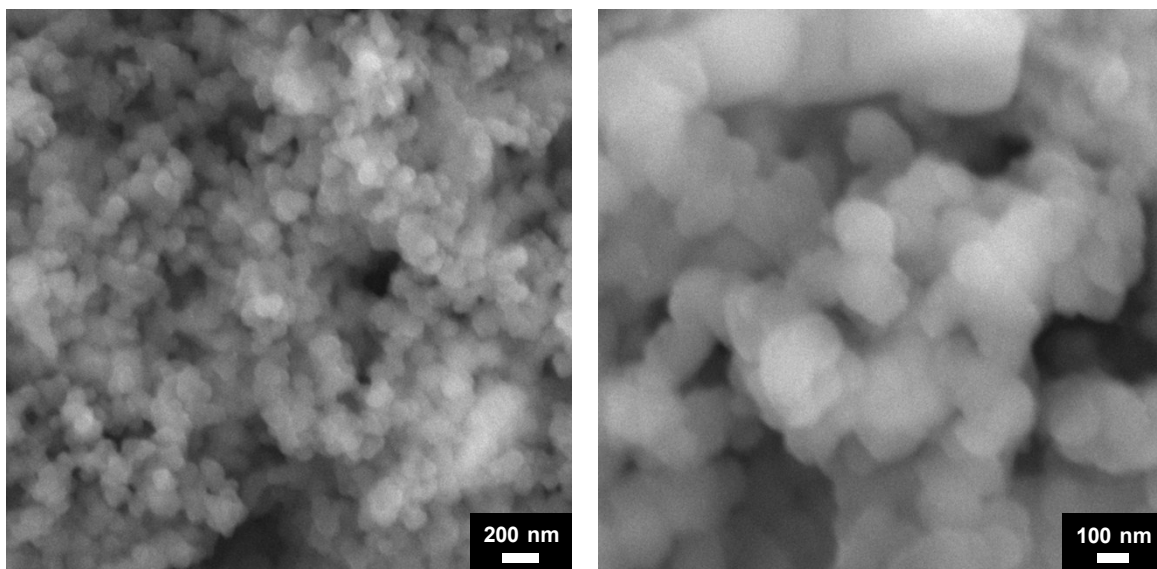

Fig. S3 PXRD patterns of H-SOM, H-SOM@SUM, and SUM-T.

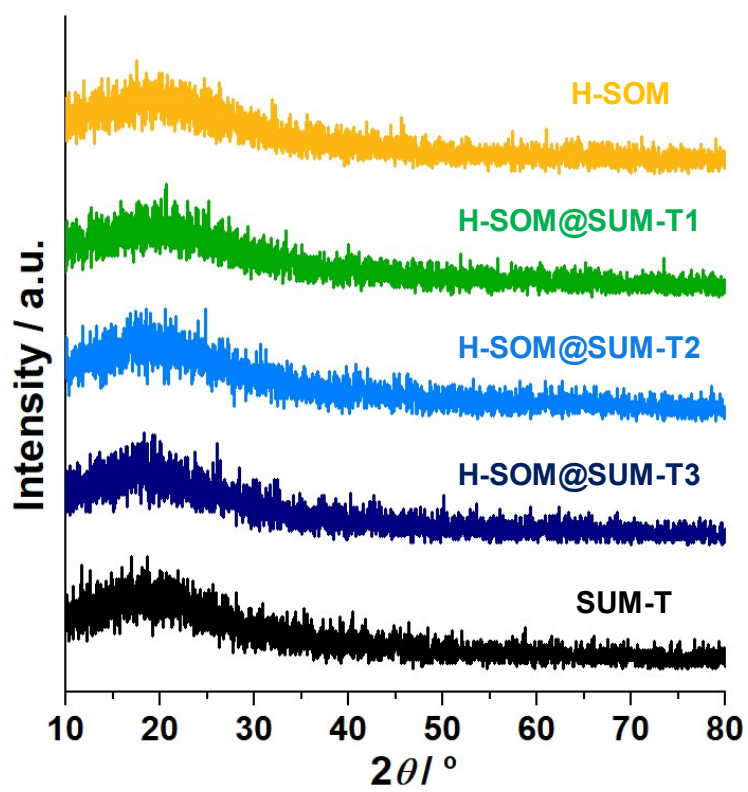

**Fig. S4** Photographs of emission quenching of the H-SOM@SUM-T2 by TNP' (a) H-SOM@SUM-T2 dispersion in water and (b) the H-SOM@SUM-T2 powder on carbon tape.

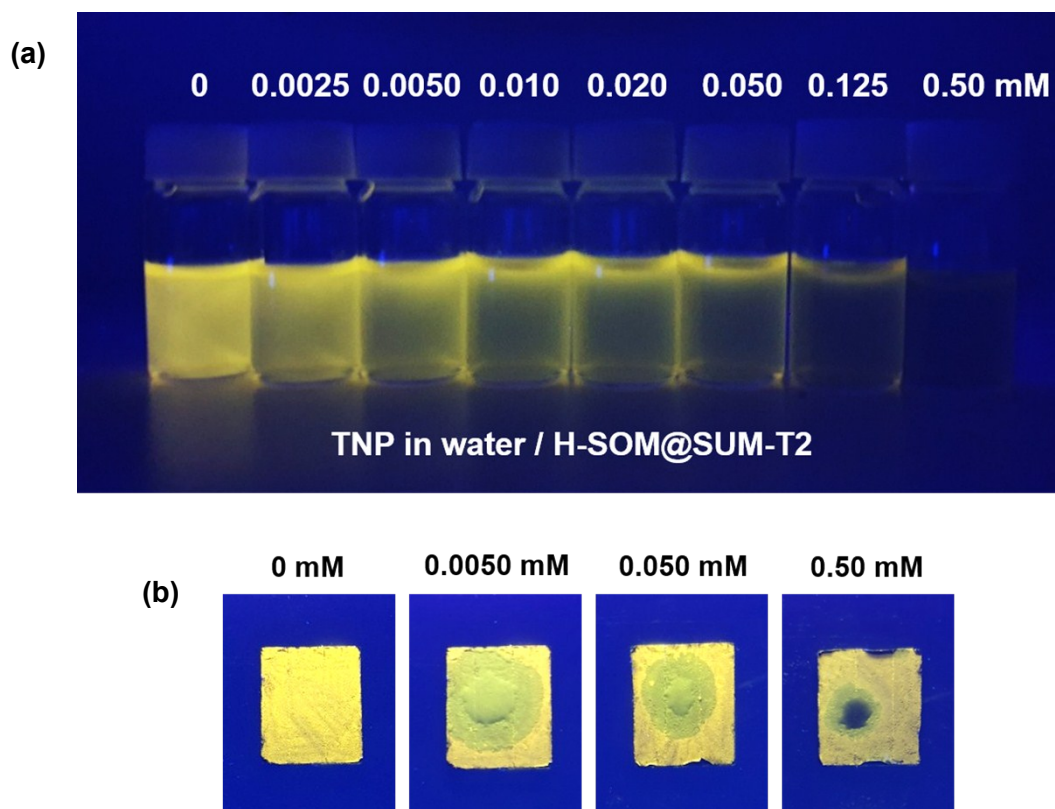



**Fig. S5** The schematic figures for model systems (SUM-T-1, SUM-T-5, and SUM-T- $\infty$ ) which can represent the SUM-T with an increasing system size (left) and their optimized structures (right).

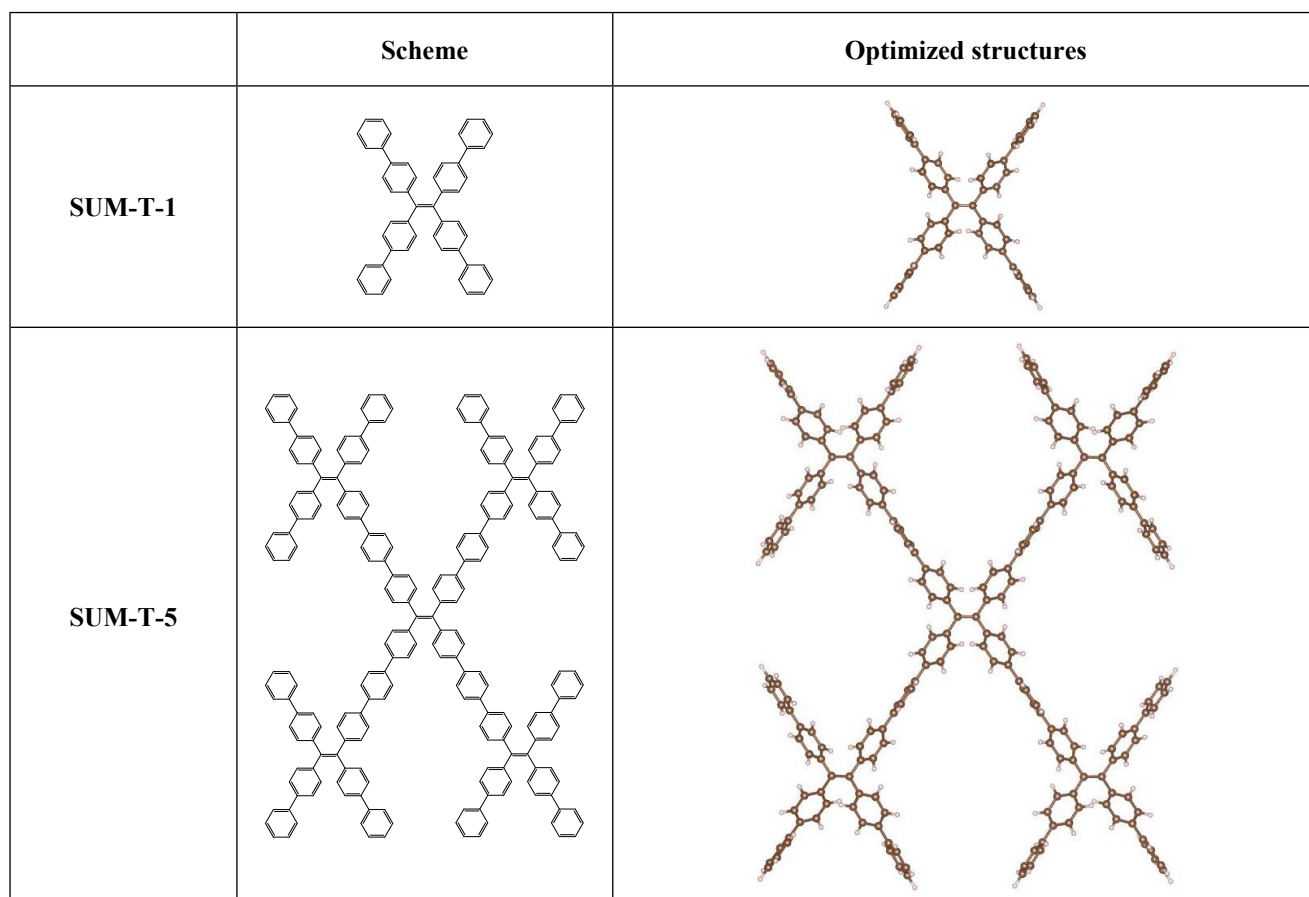

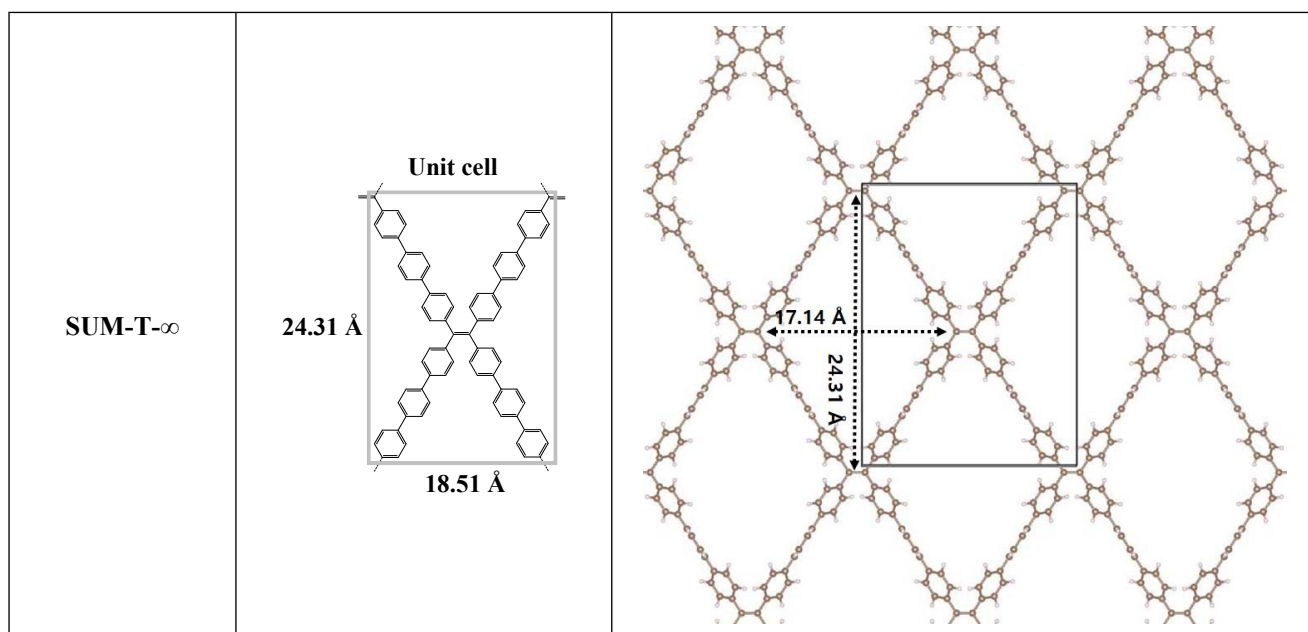

**Fig. S6** The calculated HOMO and LUMO energy levels of model systems for SUM-T and substrates (TNP, DNP, 2NP, 4NP and 4-chlorophenol, phenol and 4-methylphenol).

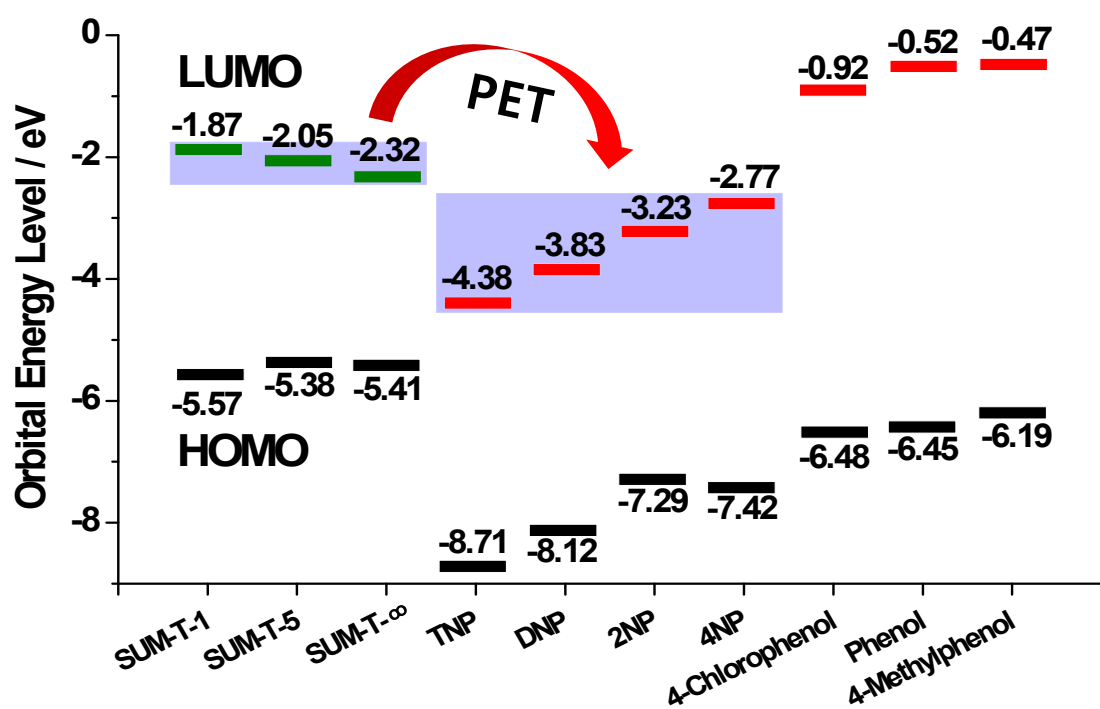





|             |           |          |             |           |          |             |           |          |
|-------------|-----------|----------|-------------|-----------|----------|-------------|-----------|----------|
| C 15.312566 | 5.462167  | 2.609903 | C 20.015467 | 14.146244 | 3.185323 | H 16.873089 | 10.569595 | 1.531743 |
| C 16.102067 | 6.752580  | 4.484860 | C 21.267422 | 14.937013 | 3.201509 | H 12.027385 | 11.597611 | 1.855754 |
| C 16.320333 | 5.712789  | 3.500517 | C 22.272568 | 14.674090 | 4.152468 | H 10.608873 | 9.234666  | 5.167609 |
| C 13.963878 | 10.280619 | 3.307613 | C 21.494439 | 15.979391 | 2.282198 | H 9.969746  | 12.954365 | 1.938591 |
| C 14.176278 | 11.348402 | 4.201595 | C 23.442856 | 15.426938 | 4.189706 | H 8.557910  | 10.600124 | 5.265208 |
| C 14.952072 | 10.035216 | 2.335573 | C 22.656206 | 16.747693 | 2.333686 | H 17.728539 | 4.792707  | 5.727829 |
| C 15.347464 | 12.099769 | 4.161931 | C 23.649713 | 16.498820 | 3.299337 | H 17.731921 | 4.823059  | 1.416590 |
| C 16.114672 | 10.802022 | 2.281913 | C 0.596323  | 17.425480 | 3.457662 | H 19.812445 | 3.477793  | 5.719478 |
| C 16.347822 | 11.839527 | 3.205195 | C 21.207260 | 1.519103  | 3.540598 | H 19.787963 | 3.468792  | 1.408209 |
| C 11.462345 | 10.291495 | 3.484803 | C 21.426982 | 2.815883  | 2.584768 | H 7.644465  | 4.850137  | 1.045240 |
| C 11.258866 | 11.364820 | 2.595412 | C 22.210655 | 0.737468  | 4.401107 | H 7.645068  | 4.863648  | 5.356558 |
| C 10.472890 | 10.051127 | 4.456823 | C 22.579516 | 2.049540  | 2.541286 | H 5.547022  | 3.556962  | 1.050322 |
| C 10.094787 | 12.126949 | 2.639621 | C 23.371933 | 0.974957  | 3.430319 | H 7.667795  | 3.530703  | 5.361514 |
| C 9.317612  | 10.828571 | 4.515113 | C 23.570820 | 2.650152  | 3.226678 | H 7.699036  | 12.771822 | 1.465864 |
| C 9.093245  | 11.872226 | 3.596608 | C 4.144062  | 2.650152  | 3.226678 | H 7.699036  | 12.782226 | 5.777084 |
| C 17.565590 | 4.911489  | 3.572520 | C 3.144418  | 2.908847  | 4.184571 | H 5.611793  | 14.126120 | 1.477042 |
| C 18.183456 | 4.516926  | 4.774429 | C 1.161688  | 1.611860  | 2.304076 | H 5.615118  | 14.097062 | 5.788296 |
| C 18.175755 | 4.518080  | 2.366123 | C 1.974402  | 2.155752  | 4.225385 | H 17.778140 | 12.715553 | 5.342183 |
| C 19.352819 | 3.758202  | 4.769693 | C 2.750207  | 0.843369  | 2.588831 | H 17.755026 | 12.745296 | 1.031000 |
| C 19.348727 | 3.768963  | 2.361400 | C 1.762345  | 1.087870  | 3.331365 | H 19.848117 | 14.048442 | 5.340769 |
| C 19.964202 | 3.562838  | 3.562838 | C 0.507183  | 0.288255  | 3.417214 | H 19.852496 | 14.038499 | 1.029445 |
| C 7.810412  | 4.958924  | 3.200851 | C 4.206301  | 15.020831 | 3.622801 | H 22.145280 | 13.847408 | 4.853962 |
| C 7.187553  | 4.575327  | 1.997969 | C 3.992573  | 16.061516 | 4.547223 | H 20.732030 | 16.214093 | 1.336801 |
| C 7.197286  | 4.567012  | 4.406237 | C 3.196798  | 14.773778 | 2.672212 | H 24.214114 | 15.187490 | 4.924456 |
| C 6.010370  | 3.828790  | 2.000790 | C 2.839762  | 16.843495 | 4.500814 | H 22.794460 | 17.563136 | 1.622165 |
| C 6.016656  | 3.830004  | 4.409087 | C 2.035349  | 15.540411 | 2.639841 | H 20.665736 | 1.293030  | 5.207886 |
| C 5.959503  | 3.441017  | 3.206656 | C 1.842256  | 16.610757 | 3.532444 | H 22.089384 | 3.644186  | 1.884112 |
| C 7.848064  | 12.673405 | 3.620241 | H 12.012455 | 5.995213  | 4.934726 | H 22.711941 | -0.079698 | 5.111760 |
| C 7.230113  | 13.072392 | 2.419649 | H 10.592937 | 8.370269  | 1.631972 | H 24.142148 | 2.280256  | 1.802748 |
| C 7.237987  | 13.062428 | 4.827931 | H 9.941581  | 4.657918  | 4.867027 | H 3.275726  | 3.732416  | 4.888982 |
| C 6.057159  | 13.821540 | 2.425983 | H 8.528563  | 7.024186  | 1.549454 | H 4.669737  | 1.380473  | 1.553219 |
| C 6.068601  | 13.821089 | 4.834270 | H 13.375008 | 5.995026  | 1.839903 | H 1.207433  | 2.391934  | 4.965579 |
| C 5.449429  | 14.216190 | 3.633210 | H 14.815289 | 8.343906  | 5.152378 | H 2.607808  | 0.031135  | 1.644463 |
| C 17.600918 | 12.628420 | 3.187079 | H 15.432948 | 4.637680  | 1.903719 | H 4.758632  | 16.283971 | 5.292623 |
| C 18.220667 | 13.015816 | 4.390543 | H 16.866624 | 6.977753  | 5.230998 | H 3.313497  | 13.948855 | 1.966810 |
| C 18.217181 | 13.016487 | 1.982234 | H 13.409110 | 11.585249 | 4.941368 | H 2.711983  | 17.657263 | 5.216201 |
| C 19.401344 | 13.752745 | 4.389682 | H 14.809289 | 9.223092  | 1.621159 | H 1.260412  | 15.313304 | 1.905134 |
| C 19.394353 | 13.763062 | 1.981398 | H 15.479410 | 12.923018 | 4.866588 |             |           |          |

**Fig. S8** The sizes and volumes of nitrophenols calculated by B3LYP/6-31+G(d,p) level of theory (Gaussian 09).

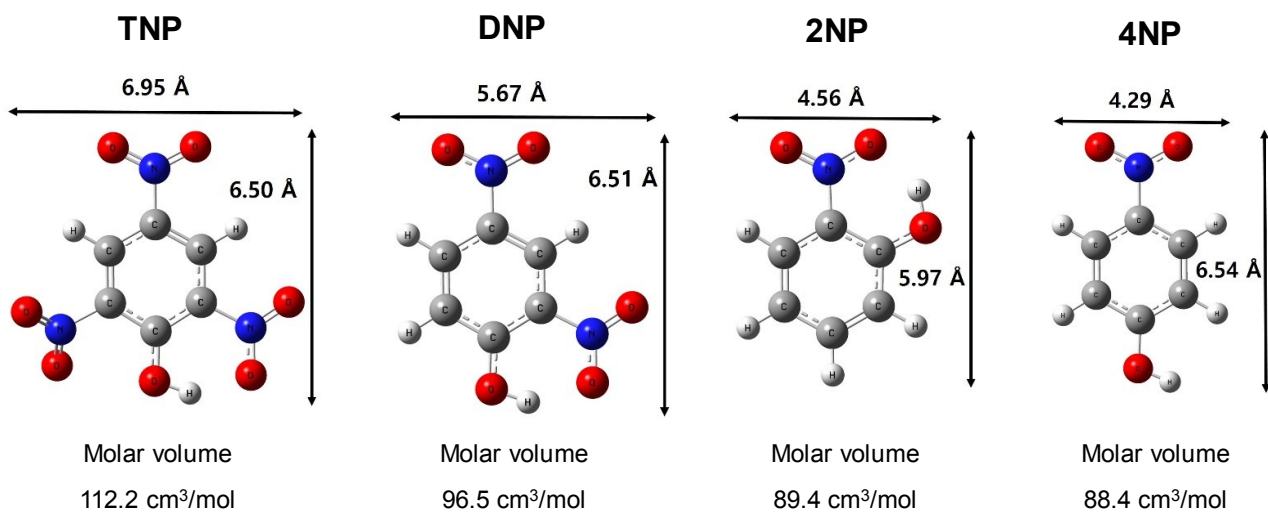

Fig. S9 TGA curve of H-SOM@SUM-T2.

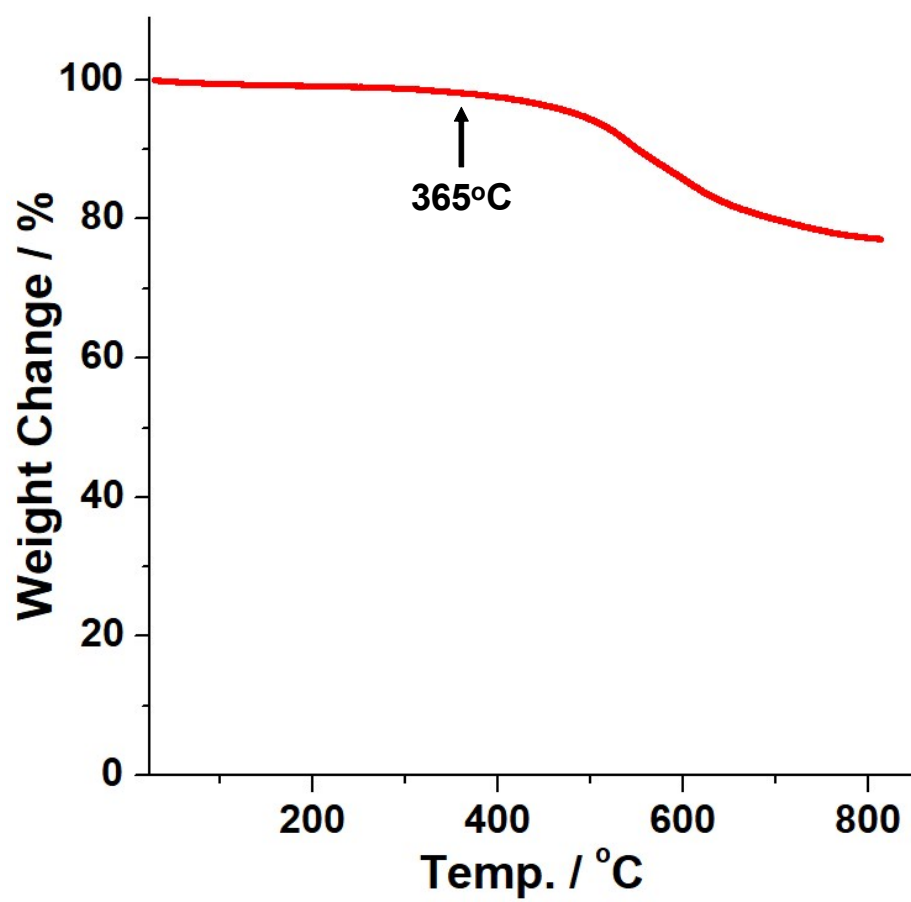

**Fig. S10** (a) SEM images and (b) IR spectra of H-SOM@SUM-T2 before and after five successive sensing tests.

**(a)**

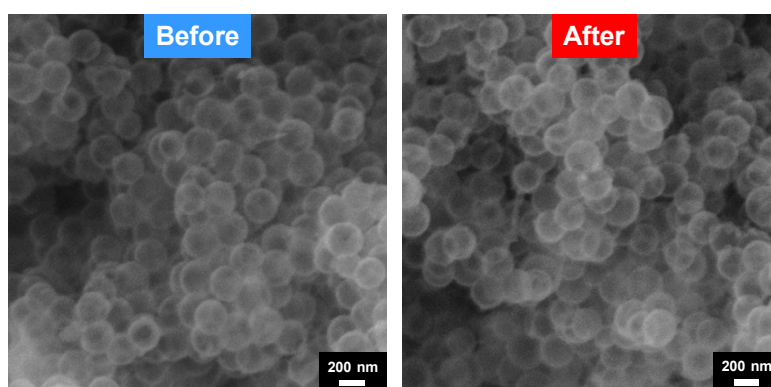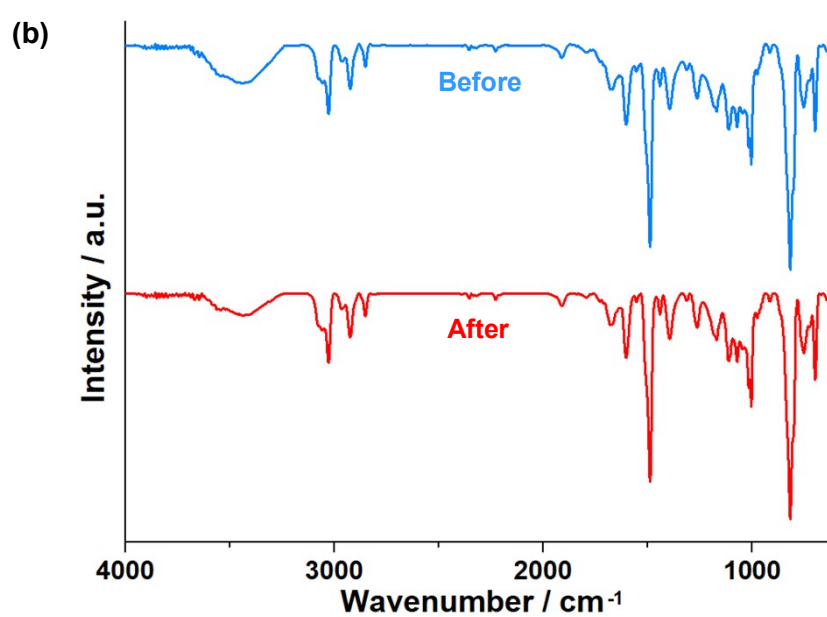

**Table S1.** Sensing performance of emissive MOP materials in the literature and H-SOM@SUM-T2 for the 2,4,6-trinitrophenols.



| Materials                                                                      | Solvent                    | Sensing Targets | $K_{sv}$<br>( $M^{-1}$ ) | Ref.      |
|--------------------------------------------------------------------------------|----------------------------|-----------------|--------------------------|-----------|
| Core-shell porous aromatic framework                                           | ethanol                    | TNP             | 5540                     | 1d        |
| Microporous polymer film with tetraphenylethylene                              | acetonitrile               | TNP             | 64000                    | 7b        |
| Porous Troger's base polymer with tetraphenylethylene                          | ethanol                    | TNP             | 26000                    | 7c        |
| Microporous polymer nanoparticles with tetraphenylethylene                     | water                      | TNP             | 12600                    | 8a        |
| Sn-porphyrin network film                                                      | water                      | TNP             | 24000                    | 8b        |
| Luminescent microporous organic polymer with 1,3,5-tri(4-ethenylphenyl)benzene | THF/H <sub>2</sub> O (9:1) | TNP             | -                        | 9a        |
| Highly cross-linked fluorescent polymer microsphere                            | methanol                   | TNP             | 15200                    | 9b        |
| Hollow microporous organic network with isocoumarins                           | H <sub>2</sub> O/THF (2:1) | TNP             | 15000                    | 9c        |
| CMP with fluorescein                                                           | THF                        | TNP             | 2080                     | 9d        |
| H-SOM@SUM-T2                                                                   | water                      | TNP             | 73000                    | This work |
